# Supplementary material
Source: PubMed Central journal article supplement (PMC7735208)

SUPPLEMENTAL DIGITAL CONTENT 3: Longitudinal analyses, 2006-2016

Supplemental Digital Content 3a: Characteristics of community-dwelling Medicare beneficiaries, 2006-2016

| Characteristic                    | Year<br>N= | Enrollees under 65 y |      |      |      |      |      |      |      |      |      | Enrollees 65 y and over |      |      |      |      |      |      |      |      |      |
|-----------------------------------|------------|----------------------|------|------|------|------|------|------|------|------|------|-------------------------|------|------|------|------|------|------|------|------|------|
|                                   |            | 2006                 | 2007 | 2008 | 2009 | 2010 | 2011 | 2012 | 2013 | 2015 | 2016 | 2006                    | 2007 | 2008 | 2009 | 2010 | 2011 | 2012 | 2013 | 2015 | 2016 |
|                                   |            | %                    | %    | %    | %    | %    | %    | %    | %    | %    | %    | %                       | %    | %    | %    | %    | %    | %    | %    | %    | %    |
| <b>Age, y</b>                     |            |                      |      |      |      |      |      |      |      |      |      |                         |      |      |      |      |      |      |      |      |      |
| ≤54                               |            | 51.6                 | 52.3 | 51.5 | 54.1 | 51.2 | 51.5 | 49.1 | 49.1 | 45.6 | 44.6 |                         |      |      |      |      |      |      |      |      |      |
| 55-64                             |            | 48.4                 | 47.7 | 48.5 | 45.9 | 48.8 | 48.5 | 50.9 | 50.9 | 54.4 | 55.4 |                         |      |      |      |      |      |      |      |      |      |
| 65-74                             |            |                      |      |      |      |      |      |      |      |      |      | 50.3                    | 50.8 | 51.6 | 52.1 | 52.6 | 53.0 | 54.3 | 55.1 | 56.5 | 57.1 |
| 75-84                             |            |                      |      |      |      |      |      |      |      |      |      | 37.3                    | 36.5 | 35.3 | 34.3 | 34.1 | 33.3 | 32.7 | 31.9 | 31.2 | 30.8 |
| ≥85                               |            |                      |      |      |      |      |      |      |      |      |      | 12.3                    | 12.7 | 13.2 | 13.5 | 13.3 | 13.7 | 13.0 | 13.0 | 12.2 | 12.1 |
| <b>Sex</b>                        |            |                      |      |      |      |      |      |      |      |      |      |                         |      |      |      |      |      |      |      |      |      |
| Male                              |            | 51.9                 | 52.4 | 52.3 | 52.8 | 52.4 | 52.5 | 51.3 | 52.9 | 50.3 | 50.0 | 43.5                    | 43.5 | 43.8 | 43.8 | 43.8 | 43.6 | 44.1 | 44.6 | 44.0 | 44.7 |
| Female                            |            | 48.1                 | 47.6 | 47.7 | 47.2 | 47.6 | 47.5 | 48.7 | 47.1 | 49.7 | 50.0 | 56.5                    | 56.5 | 56.2 | 56.2 | 56.2 | 56.4 | 55.9 | 55.4 | 56.0 | 55.3 |
| <b>Household income, \$</b>       |            |                      |      |      |      |      |      |      |      |      |      |                         |      |      |      |      |      |      |      |      |      |
| < \$25K                           |            | 72.4                 | 71.1 | 67.5 | 69.6 | 69.9 | 69.9 | 69.7 | 71.8 | 70.3 | 69.9 | 45.5                    | 43.8 | 42.2 | 40.4 | 39.6 | 38.2 | 37.2 | 36.1 | 37.6 | 35.6 |
| > \$50K                           |            | 24.4                 | 25.9 | 28.4 | 26.7 | 27.3 | 27.6 | 27.4 | 26.3 | 29.7 | 30.1 | 49.6                    | 51.1 | 53.2 | 54.6 | 55.2 | 56.8 | 58.2 | 59.6 | 62.4 | 64.4 |
| <b>Education</b>                  |            |                      |      |      |      |      |      |      |      |      |      |                         |      |      |      |      |      |      |      |      |      |
| No high school diploma            |            | 29.2                 | 28.4 | 28.8 | 26.3 | 25.5 | 24.1 | 22.5 | 22.0 | 21.1 | 21.0 | 25.9                    | 25.0 | 23.5 | 22.8 | 22.3 | 21.6 | 20.6 | 18.7 | 16.7 | 16.4 |
| High school diploma               |            | 33.4                 | 33.7 | 33.4 | 33.3 | 32.7 | 31.8 | 32.7 | 31.6 | 35.7 | 35.0 | 30.2                    | 30.3 | 30.5 | 29.2 | 28.0 | 27.6 | 26.9 | 27.2 | 26.0 | 25.6 |
| Some college                      |            | 28.2                 | 28.9 | 29.1 | 31.4 | 33.1 | 34.4 | 35.0 | 36.5 | 34.2 | 33.3 | 25.4                    | 25.6 | 26.2 | 26.7 | 27.5 | 27.1 | 28.3 | 29.0 | 29.5 | 28.6 |
| Bachelors and above               |            | 8.5                  | 8.2  | 8.1  | 8.4  | 8.1  | 9.2  | 9.2  | 9.5  | 8.6  | 10.1 | 18.0                    | 18.5 | 19.4 | 20.9 | 21.8 | 23.2 | 23.7 | 24.7 | 27.3 | 28.9 |
| <b>Race</b>                       |            |                      |      |      |      |      |      |      |      |      |      |                         |      |      |      |      |      |      |      |      |      |
| White                             |            | 72.9                 | 72.7 | 72.2 | 70.8 | 70.8 | 71.8 | 69.5 | 68.8 | 70.6 | 70.2 | 85.8                    | 85.3 | 85.1 | 85.1 | 84.9 | 85.0 | 84.3 | 84.0 | 82.4 | 82.7 |
| African American                  |            | 18.7                 | 18.5 | 18.8 | 19.4 | 18.3 | 18.5 | 18.5 | 19.0 | 18.4 | 18.1 | 7.7                     | 7.7  | 8.2  | 8.0  | 8.2  | 8.1  | 8.0  | 8.3  | 8.4  | 8.9  |
| All Other                         |            | 8.2                  | 8.5  | 8.6  | 9.3  | 10.5 | 9.1  | 11.1 | 10.9 | 9.4  | 9.1  | 6.2                     | 6.5  | 6.4  | 6.5  | 6.5  | 6.5  | 7.0  | 7.1  | 8.2  | 6.9  |
| <b>Hispanic ethnicity</b>         |            |                      |      |      |      |      |      |      |      |      |      |                         |      |      |      |      |      |      |      |      |      |
| Not Hispanic                      |            | 89.1                 | 88.8 | 88.2 | 87.9 | 88.2 | 87.4 | 86.8 | 85.4 | 87.1 | 87.8 | 92.7                    | 92.4 | 92.4 | 92.1 | 91.7 | 91.1 | 90.5 | 90.9 | 90.9 | 91.5 |
| Hispanic                          |            | 10.8                 | 11.1 | 11.6 | 12.1 | 11.5 | 12.3 | 13.1 | 14.3 | 12.6 | 11.6 | 7.2                     | 7.3  | 7.4  | 7.7  | 8.0  | 8.6  | 9.1  | 8.7  | 8.6  | 8.0  |
| <b>General health status</b>      |            |                      |      |      |      |      |      |      |      |      |      |                         |      |      |      |      |      |      |      |      |      |
| Excellent, very good, or good     |            | 40.6                 | 39.1 | 40.5 | 40.5 | 42.3 | 40.5 | 40.7 | 36.8 | 42.2 | 42.8 | 78.9                    | 78.3 | 79.3 | 80.5 | 80.3 | 80.5 | 80.7 | 81.0 | 80.6 | 82.0 |
| Fair or poor                      |            | 59.0                 | 60.4 | 58.9 | 58.9 | 57.4 | 59.0 | 58.8 | 62.8 | 56.8 | 56.5 | 20.6                    | 21.2 | 20.1 | 18.9 | 19.2 | 19.2 | 19.0 | 18.6 | 18.7 | 17.6 |
| <b>No. of limitations in ADLs</b> |            |                      |      |      |      |      |      |      |      |      |      |                         |      |      |      |      |      |      |      |      |      |
| Zero                              |            | 53.9                 | 53.5 | 52.4 | 51.2 | 49.0 | 46.6 | 40.5 | 43.3 | 39.6 | 47.3 | 72.6                    | 73.9 | 72.4 | 72.7 | 71.9 | 70.7 | 67.3 | 70.2 | 69.5 | 73.9 |
| 1 to 2                            |            | 27.4                 | 29.6 | 27.4 | 29.8 | 30.7 | 32.1 | 34.5 | 33.2 | 36.3 | 29.5 | 19.1                    | 18.8 | 20.0 | 18.6 | 19.7 | 20.7 | 23.0 | 20.9 | 21.6 | 17.9 |
| 3 to 6                            |            | 18.5                 | 16.4 | 19.4 | 18.6 | 20.1 | 21.2 | 24.9 | 23.2 | 24.0 | 23.2 | 8.1                     | 7.0  | 7.1  | 8.2  | 8.1  | 8.5  | 9.6  | 8.8  | 8.9  | 8.2  |
| <b>No. of chronic conditions</b>  |            |                      |      |      |      |      |      |      |      |      |      |                         |      |      |      |      |      |      |      |      |      |
| Zero or 1                         |            | 21.7                 | 22.2 | 21.0 | 21.2 | 18.8 | 18.7 | 18.9 | 18.2 | 16.6 | 19.0 | 25.8                    | 25.6 | 24.9 | 26.2 | 25.3 | 23.9 | 22.8 | 23.3 | 22.8 | 27.1 |
| 2 to 3                            |            | 41.1                 | 42.0 | 40.2 | 40.7 | 41.9 | 42.3 | 41.5 | 39.4 | 37.1 | 40.1 | 47.9                    | 47.3 | 47.1 | 46.3 | 47.2 | 47.6 | 46.8 | 46.1 | 46.6 | 46.2 |
| 4 to 10                           |            | 37.2                 | 35.7 | 38.8 | 38.1 | 39.3 | 39.0 | 39.7 | 42.4 | 46.3 | 40.9 | 26.3                    | 27.1 | 28.0 | 27.4 | 27.5 | 28.5 | 30.4 | 30.6 | 30.5 | 26.7 |
| <b>Drug Coverage</b>              |            |                      |      |      |      |      |      |      |      |      |      |                         |      |      |      |      |      |      |      |      |      |
| Part D with Low Income Subsidy    |            | 51.2                 | 51.4 | 50.6 | 51.8 | 53.7 | 54.3 | 56.6 | 56.0 | 59.4 | 58.0 | 15.3                    | 14.8 | 14.4 | 13.9 | 14.3 | 14.8 | 14.6 | 14.2 | 14.8 | 14.5 |
| Medicare Advantage with Part D    |            | 7.8                  | 7.6  | 8.7  | 10.8 | 11.4 | 11.0 | 11.8 | 13.8 | 13.1 | 12.5 | 15.4                    | 17.5 | 18.8 | 21.3 | 21.6 | 22.9 | 24.5 | 26.6 | 28.3 | 29.0 |
| Traditional Medicare with Part D  |            | 7.5                  | 9.1  | 10.0 | 10.6 | 8.4  | 8.8  | 7.3  | 8.5  | 10.2 | 10.0 | 22.1                    | 22.7 | 23.5 | 22.2 | 22.0 | 22.6 | 23.8 | 28.8 | 30.8 | 31.6 |
| Other drug supplement plan        |            | 17.8                 | 16.6 | 17.6 | 15.8 | 14.1 | 13.4 | 12.1 | 11.1 | 11.1 | 12.8 | 33.5                    | 32.0 | 30.3 | 29.3 | 28.7 | 26.7 | 23.6 | 17.1 | 18.9 | 18.0 |
| No drug coverage                  |            | 15.7                 | 15.3 | 13.1 | 11.1 | 12.4 | 12.5 | 12.2 | 10.6 | 6.2  | 6.8  | 13.7                    | 13.1 | 13.0 | 13.3 | 13.4 | 13.0 | 13.4 | 13.3 | 7.3  | 6.8  |

Supplemental Digital Content 3b: Detailed prevalence of study outcomes, 2006-2015

| Study outcome                                                                                                           | Enrollees under 65 years |                  |                  |                  |                  |                  |                  |                  |                  |                  |
|-------------------------------------------------------------------------------------------------------------------------|--------------------------|------------------|------------------|------------------|------------------|------------------|------------------|------------------|------------------|------------------|
|                                                                                                                         | % (95% CI)               |                  |                  |                  |                  |                  |                  |                  |                  |                  |
|                                                                                                                         | 2006                     | 2007             | 2008             | 2009             | 2010             | 2011             | 2012             | 2013             | 2015             | 2016             |
| <b>Any cost-related nonadherence (CRN composite)</b>                                                                    | 35.5 (32.9-38.1)         | 31.4 (28.1-34.6) | 32.1 (28.9-35.2) | 31.5 (28.9-34.2) | 33.8 (31.5-36.1) | 33.5 (30.9-36.2) | 40 (37.1-42.9)   | 36.1 (33-39.1)   | 35.8 (32.4-39.2) | 34.5 (31.0-37.0) |
| "Skipped doses to make the medicine last longer"                                                                        | 19.3 (17.1-21.5)         | 17.1 (14.6-19.7) | 15.9 (13.8-18.1) | 17.6 (15.4-19.7) | 15.3 (13.6-17.1) | 14.2 (12.6-15.9) | 16.8 (14.7-19)   | 15.4 (13.1-17.8) | 17 (14.7-19.3)   | 15.2 (13.3-17.1) |
| "Took smaller doses than prescribed to make the medicine last longer"                                                   | 20.5 (17.9-23)           | 18 (15.3-20.7)   | 17.1 (15-19.3)   | 17 (14.7-19.3)   | 18.1 (16.1-20.1) | 16.9 (14.8-18.9) | 21.1 (18.5-23.7) | 18.3 (15.7-21)   | 19.2 (16.9-21.4) | 16.2 (14.1-18.4) |
| "Decided not to fill a prescription because it cost too much"                                                           | 22.8 (20.7-25)           | 19.8 (17-22.5)   | 20 (17.8-22.3)   | 20.7 (18.3-23)   | 20.7 (18.7-22.8) | 20.5 (18.4-22.6) | 24.3 (21.9-26.6) | 22.1 (19.6-24.6) | 22.6 (19.3-25.9) | 22.0 (19.6-24.4) |
| "Delayed getting a prescription filled because it cost too much"                                                        | 23.1 (20.9-25.3)         | 20.8 (18-23.6)   | 19.9 (17.7-22.1) | 20.6 (18.1-23.1) | 21.4 (19.4-23.5) | 20.4 (18.3-22.4) | 22.8 (20.4-25.2) | 20.9 (18.5-23.2) | 21.6 (18.9-24.2) | 20.6 (18.4-22.8) |
| "Did not get a prescribed medicine", and "reason" was "cost"                                                            | 6.5 (5.2-7.9)            | 6.3 (4.9-7.7)    | 5.4 (4.4-6.3)    | 5.7 (4.2-7.2)    | 6.9 (5.5-8.2)    | 5.3 (4.6-7)      | 5.8 (4.5-7.1)    | 7.5 (5.9-9.2)    | 8.1 (6.1-10)     | 8.0 (6.3-9.7)    |
| <b>"Spent less money on food, heat, or other basic needs to have money for medicine"</b>                                | 21.7 (19.3-24.1)         | 18.9 (16.7-21.1) | 17.5 (14.9-20.2) | 18.3 (15.6-21)   | 18.1 (16.2-20.1) | 21.5 (19.1-23.9) | 25.3 (23-27.6)   | 22 (19.3-24.7)   | 21.5 (18.7-24.4) | 19.4 (17.0-21.7) |
| <b>Any drug cost reduction strategy (composite)<sup>(4)</sup></b>                                                       | N/A                      | N/A              | N/A              | N/A              | N/A              | 61.9 (58.8-65.1) | 59.9 (57.3-62.4) | 52.9 (50-55.7)   | 48.1 (45-51.1)   | 47.6 (44.4-50.9) |
| "Asked for generics instead of brand name drugs"                                                                        | 50.8 (47.4-54.2)         | 48.1 (44.5-51.8) | 53.7 (49.8-57.5) | 51.9 (48.2-55.6) | 55 (51.8-58.1)   | 53.2 (49.6-56.8) | 48.3 (45.3-51.2) | 43.4 (40.2-46.5) | 37.8 (34.8-40.8) | 36.8 (33.4-40.1) |
| "Compared prices or shopped around for the best price"                                                                  | 23.2 (20.6-25.8)         | 20.5 (18-23)     | 22.4 (19.6-25.2) | 22.7 (20-25.4)   | 22.6 (20.2-25)   | 20.5 (18-22.9)   | 25 (22.6-27.4)   | 20.2 (17.7-22.8) | 19 (15.8-22.2)   | 21.4 (19.1-23.6) |
| "Talked with doctor about stopping a medicine to save money or substituting a medicine with one that is less expensive" | N/A                      | N/A              | N/A              | N/A              | N/A              | 22.4 (20.2-24.5) | 26.7 (24.4-29)   | 21.6 (19.3-23.9) | 22 (19.3-24.8)   | 19.8 (17.5-22.0) |

| Study outcome                                                                                                           | Enrollees 65 years and over |                  |                  |                  |                  |                  |                  |                  |                  |                  |
|-------------------------------------------------------------------------------------------------------------------------|-----------------------------|------------------|------------------|------------------|------------------|------------------|------------------|------------------|------------------|------------------|
|                                                                                                                         | % (95% CI)                  |                  |                  |                  |                  |                  |                  |                  |                  |                  |
|                                                                                                                         | 2006                        | 2007             | 2008             | 2009             | 2010             | 2011             | 2012             | 2013             | 2015             | 2016             |
| <b>Any cost-related nonadherence (CRN composite)</b>                                                                    | 12.2 (11.5-13)              | 11.2 (10.3-12.1) | 10.3 (9.5-11)    | 10.1 (9.4-10.9)  | 11.2 (10.4-12.1) | 10.8 (10-11.6)   | 13.9 (13.1-14.7) | 12.4 (11.6-13.2) | 14 (12.8-15.3)   | 14.4 (13.4-15.3) |
| "Skipped doses to make the medicine last longer"                                                                        | 5.2 (4.7-5.7)               | 5.4 (4.8-6)      | 3.8 (3.3-4.2)    | 4 (3.4-4.6)      | 4 (3.5-4.4)      | 4 (3.5-4.4)      | 4.3 (3.9-4.8)    | 3.5 (3.1-3.9)    | 4.2 (3.6-4.7)    | 4.3 (3.8-4.7)    |
| "Took smaller doses than prescribed to make the medicine last longer"                                                   | 6.6 (6.1-7.1)               | 6.2 (5.5-6.8)    | 4.5 (4-5)        | 4.6 (4.1-5.1)    | 5.1 (4.5-5.7)    | 4.4 (3.9-5)      | 5.8 (5.3-6.4)    | 4.6 (4.1-5.1)    | 5.1 (4.4-5.8)    | 5.1 (4.5-5.7)    |
| "Decided not to fill a prescription because it cost too much"                                                           | 5.7 (5.2-6.2)               | 6 (5.4-6.6)      | 5.3 (4.8-5.9)    | 5.5 (5-6)        | 6.2 (5.6-6.9)    | 6.2 (5.6-6.7)    | 7.7 (7.1-8.3)    | 7.1 (6.5-7.7)    | 8.6 (7.6-9.7)    | 8.7 (8.0-9.5)    |
| "Delayed getting a prescription filled because it cost too much"                                                        | 6.3 (5.7-6.8)               | 6.4 (5.7-7)      | 4.5 (4-4.9)      | 4.7 (4.2-5.2)    | 5.5 (5-6)        | 5 (4.5-5.5)      | 6 (5.4-6.5)      | 5.4 (4.8-6)      | 6.7 (5.8-7.5)    | 6.5 (5.9-7.1)    |
| "Did not get a prescribed medicine", and "reason" was "cost"                                                            | 1.1 (0.9-1.3)               | 1.4 (1.1-1.7)    | 1.5 (1.2-1.8)    | 1.6 (1.3-1.9)    | 1.6 (1.3-1.9)    | 1.6 (1.4-1.9)    | 2.2 (1.8-2.5)    | 1.7 (1.4-2)      | 3 (2.4-3.6)      | 2.9 (2.4-3.3)    |
| <b>"Spent less money on food, heat, or other basic needs to have money for medicine"</b>                                | 5 (4.5-5.5)                 | 5.6 (5-6.2)      | 4.5 (3.8-5.2)    | 3.9 (3.5-4.4)    | 4.4 (3.8-5)      | 5.3 (4.8-5.8)    | 5.5 (5-6.1)      | 5 (4.5-5.6)      | 5.1 (4.4-5.7)    | 4.7 (4.1-5.2)    |
| <b>Any drug cost reduction strategy (composite)</b>                                                                     | N/A                         | N/A              | N/A              | N/A              | N/A              | 55.5 (53.0-58.0) | 51.2 (49.5-52.9) | 48.2 (46.3-50)   | 44.4 (42.5-46.3) | 44.0 (42.2-45.8) |
| "Asked for generics instead of brand name drugs"                                                                        | 47 (44.7-49.2)              | 48.3 (46.1-50.5) | 50.4 (47.7-53.1) | 47.3 (45-49.5)   | 51.5 (49.3-53.8) | 50.6 (47.8-53.3) | 44.9 (43-46.7)   | 42.1 (40.1-44.1) | 37.2 (35.3-39.1) | 36.9 (35.0-38.6) |
| "Compared prices or shopped around for the best price"                                                                  | 16.5 (15.4-17.6)            | 15.5 (14.4-16.6) | 16.6 (15-18.2)   | 15.8 (14.4-17.2) | 17 (15.6-18.4)   | 15.8 (14.6-16.9) | 15.5 (14.5-16.5) | 13.9 (12.9-14.9) | 14.2 (13-15.4)   | 14.3 (13.3-15.3) |
| "Talked with doctor about stopping a medicine to save money or substituting a medicine with one that is less expensive" | N/A                         | N/A              | N/A              | N/A              | N/A              | 13.4 (12.5-14.3) | 15.1 (14.3-16)   | 13 (12.2-13.8)   | 14.2 (13.2-15.3) | 13.9 (13.0-14.9) |

\* "Talked with doctor about stopping a medicine" question available since 2011. Cost reduction strategies composite constructed for 2011-2016 only.

Supplemental Digital Content 3c: Annual prevalence of use of cost reduction strategies, 2011 to 2016

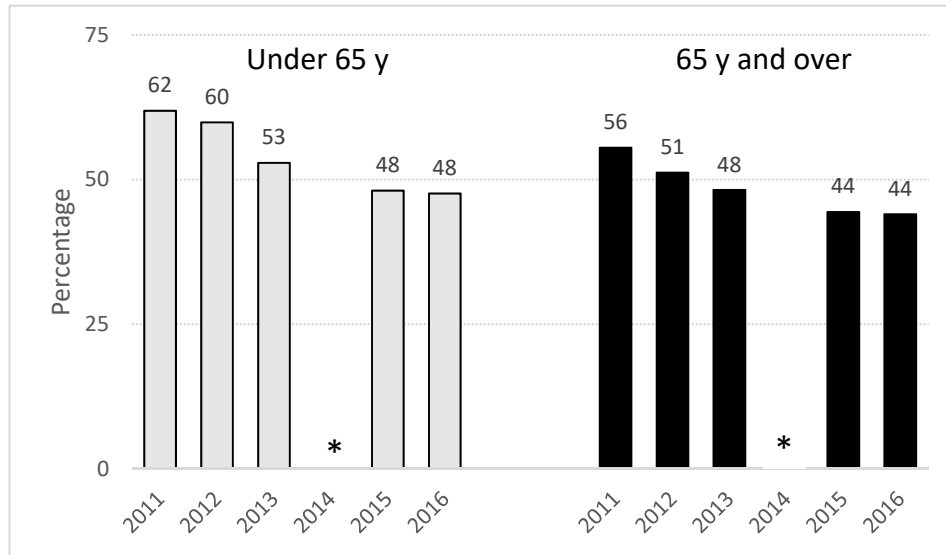

Supplement: NIHMS1638471-supplement-Supplemental_Data_File___doc___tif__pdf__etc___3.pdf [file NIHMS1638471-supplement-Supplemental_Data_File___doc___tif__pdf__etc___3.pdf]
