# Supplementary material
Source: PubMed Central journal article supplement (PMC7735208)
Supplement: NIHMS1638471-supplement-Supplemental_Data_File___doc___tif__pdf__etc___1.pdf [file NIHMS1638471-supplement-Supplemental_Data_File___doc___tif__pdf__etc___1.pdf]

**SUPPLEMENTAL DIGITAL CONTENT 1:**

**Sensitivity analyses showing adjusted odds ratio estimates of CRN, spending less on other basic needs to afford medicine, and cost reduction strategies with drug coverage omitted**

| Characteristic                     | Any cost-related nonadherence |                         | Spent less on other basic needs |                         | Any cost reduction strategy |                         |
|------------------------------------|-------------------------------|-------------------------|---------------------------------|-------------------------|-----------------------------|-------------------------|
|                                    | Under 65 y                    | 65 y and over           | Under 65 y                      | 65 y and over           | Under 65 y                  | 65 y and over           |
|                                    | OR (95% CI)                   | OR (95% CI)             | OR (95% CI)                     | OR (95% CI)             | OR (95% CI)                 | OR (95% CI)             |
| <b>Age, y</b>                      |                               |                         |                                 |                         |                             |                         |
| ≤54                                | 1.00                          |                         | 1.00                            |                         | 1.00                        |                         |
| 55-64                              | 0.80 (0.62-1.03)              |                         | 0.98 (0.73-1.31)                |                         | 1.17 (0.91-1.51)            |                         |
| 65-74                              |                               | 1.00                    |                                 | 1.00                    |                             | 1.00                    |
| 75-84                              |                               | <b>0.58 (0.49-0.68)</b> |                                 | <b>0.60 (0.48-0.75)</b> |                             | <b>0.78 (0.69-0.87)</b> |
| ≥85                                |                               | <b>0.33 (0.26-0.42)</b> |                                 | <b>0.23 (0.16-0.32)</b> |                             | <b>0.51 (0.45-0.58)</b> |
| <b>Sex</b>                         |                               |                         |                                 |                         |                             |                         |
| Male                               | 1.00                          |                         | 1.00                            |                         | 1.00                        |                         |
| Female                             | <b>1.62 (1.28-2.05)</b>       | <b>1.24 (1.07-1.43)</b> | <b>1.52 (1.07-2.16)</b>         | <b>1.32 (1.05-1.67)</b> | <b>1.42 (1.11-1.80)</b>     | 1.07 (0.98-1.17)        |
| <b>Household income, \$</b>        |                               |                         |                                 |                         |                             |                         |
| < \$15K                            | 0.67 (0.43-1.05)              | 1.01 (0.79-1.29)        | 1.05 (0.62-1.80)                | <b>2.22 (1.44-3.42)</b> | <b>0.56 (0.37-0.84)</b>     | <b>0.74 (0.63-0.86)</b> |
| \$15k to \$25k                     | 0.98 (0.63-1.52)              | <b>1.48 (1.24-1.77)</b> | 1.40 (0.74-2.67)                | <b>3.01 (2.06-4.40)</b> | 0.94 (0.58-1.53)            | 0.94 (0.82-1.09)        |
| \$25k to \$50k                     | 0.98 (0.57-1.68)              | <b>1.42 (1.23-1.65)</b> | 1.35 (0.76-2.41)                | <b>1.92 (1.26-2.92)</b> | 0.80 (0.49-1.32)            | 1.07 (0.94-1.22)        |
| > \$50K                            | 1.00                          |                         | 1.00                            |                         | 1.00                        |                         |
| <b>Education</b>                   |                               |                         |                                 |                         |                             |                         |
| No high school diploma             | 1.34 (0.70-2.54)              | 1.01 (0.82-1.25)        | 0.76 (0.39-1.46)                | <b>1.60 (1.02-2.52)</b> | 0.67 (0.40-1.11)            | <b>0.78 (0.66-0.91)</b> |
| High school diploma                | 0.97 (0.59-1.60)              | 0.88 (0.72-1.08)        | 0.86 (0.48-1.56)                | <b>1.54 (1.02-2.34)</b> | 0.76 (0.48-1.18)            | 0.90 (0.77-1.04)        |
| Some college                       | 1.15 (0.67-1.98)              | 1.04 (0.85-1.26)        | 0.90 (0.47-1.72)                | 1.28 (0.87-1.88)        | 0.86 (0.55-1.34)            | 0.94 (0.81-1.10)        |
| Bachelors and above                | 1.00                          |                         | 1.00                            |                         | 1.00                        |                         |
| <b>Race</b>                        |                               |                         |                                 |                         |                             |                         |
| White                              | 1.00                          |                         | 1.00                            |                         | 1.00                        |                         |
| African American                   | 1.14 (0.81-1.63)              | 1.19 (0.91-1.56)        | <b>1.64 (1.11-2.44)</b>         | <b>1.76 (1.31-2.36)</b> | <b>0.63 (0.45-0.88)</b>     | <b>0.62 (0.50-0.76)</b> |
| All Other                          | 1.34 (0.86-2.08)              | 0.92 (0.68-1.24)        | <b>1.74 (1.06-2.86)</b>         | <b>1.67 (1.12-2.48)</b> | <b>0.94 (0.61-1.42)</b>     | <b>0.68 (0.54-0.87)</b> |
| <b>Hispanic ethnicity</b>          |                               |                         |                                 |                         |                             |                         |
| Not Hispanic                       | 1.00                          |                         | 1.00                            |                         | 1.00                        |                         |
| Hispanic                           | <b>0.48 (0.33-0.70)</b>       | 0.82 (0.63-1.06)        | 0.67 (0.41-1.10)                | 0.79 (0.49-1.28)        | <b>0.47 (0.32-0.67)</b>     | <b>0.61 (0.48-0.77)</b> |
| <b>General health status</b>       |                               |                         |                                 |                         |                             |                         |
| Excellent, very good, or good      | 1.00                          |                         | 1.00                            |                         | 1.00                        |                         |
| Fair or poor                       | <b>1.40 (1.06-1.87)</b>       | <b>1.50 (1.26-1.79)</b> | <b>1.64 (1.14-2.35)</b>         | <b>1.71 (1.28-2.29)</b> | 1.06 (0.85-1.32)            | 1.01 (0.89-1.14)        |
| <b>No. of limitations in ADLs*</b> |                               |                         |                                 |                         |                             |                         |
| Zero                               | 1.00                          |                         | 1.00                            |                         | 1.00                        |                         |
| 1 to 2                             | 1.20 (0.86-1.68)              | <b>1.57 (1.32-1.87)</b> | 1.27 (0.92-1.76)                | <b>2.27 (1.64-3.15)</b> | 1.07 (0.83-1.36)            | 1.20 (1.05-1.37)        |
| 3 to 6                             | <b>1.43 (1.01-2.04)</b>       | <b>1.98 (1.61-2.44)</b> | <b>2.17 (1.48-3.19)</b>         | <b>2.88 (1.90-4.37)</b> | 1.26 (0.90-1.77)            | <b>1.43 (1.20-1.70)</b> |
| <b>No. of chronic conditions</b>   |                               |                         |                                 |                         |                             |                         |
| Zero or 1                          | 1.00                          |                         | 1.00                            |                         | 1.00                        |                         |
| 2 to 3                             | <b>1.72 (1.23-2.41)</b>       | <b>1.69 (1.39-2.06)</b> | 1.33 (0.81-2.17)                | <b>1.87 (1.21-2.89)</b> | 1.28 (0.90-1.82)            | <b>1.66 (1.47-1.87)</b> |
| 4 to 10                            | <b>1.91 (1.42-2.56)</b>       | <b>2.10 (1.67-2.65)</b> | <b>1.71 (1.08-2.72)</b>         | <b>2.49 (1.54-4.02)</b> | <b>1.81 (1.31-2.50)</b>     | <b>2.11 (1.87-2.39)</b> |
