# Supplementary material
Source: PubMed Central journal article supplement (PMC7735208)
Supplement: NIHMS1638471-supplement-Supplemental_Data_File___doc___tif__pdf__etc___2.pdf [file NIHMS1638471-supplement-Supplemental_Data_File___doc___tif__pdf__etc___2.pdf]

SUPPLEMENTAL DIGITAL CONTENT 2

Sensitivity analyses examining US region and specific chronic conditions as potential risk factors

**Supplemental Digital Content 2a:**  
**Population characteristics and prevalence of study outcomes by characteristic --**  
**US region and specific chronic conditions**

| Characteristic                     | Characteristics of community-dwelling Medicare beneficiaries in 2016 |                     |               |                     | Prevalence of study outcomes, by US region and specific chronic condition |                     |                                 |                     |                             |                     |  |  |
|------------------------------------|----------------------------------------------------------------------|---------------------|---------------|---------------------|---------------------------------------------------------------------------|---------------------|---------------------------------|---------------------|-----------------------------|---------------------|--|--|
|                                    | Under 65 y                                                           |                     | 65 y and over |                     | Any cost-related nonadherence                                             |                     | Spent less on other basic needs |                     | Any cost reduction strategy |                     |  |  |
|                                    | N                                                                    | Weighted % (95% CI) | N             | Weighted % (95% CI) | Under 65 y                                                                | 65 y and over       | Under 65 y                      | 65 y and over       | Under 65 y                  | 65 y and over       |  |  |
|                                    |                                                                      |                     |               |                     | Weighted % (95% CI)                                                       | Weighted % (95% CI) | Weighted % (95% CI)             | Weighted % (95% CI) | Weighted % (95% CI)         | Weighted % (95% CI) |  |  |
| <b>US region</b>                   |                                                                      |                     |               |                     |                                                                           |                     |                                 |                     |                             |                     |  |  |
| Northeast                          | 358                                                                  | 18.0 (14.0-21.9)    | 1815          | 18.5 (14.6-22.3)    | 26.8 (20.3-33.3)                                                          | 11.3 (9.6-13.0)     | 11.9 (6.5-17.2)                 | 4.2 (3.2-5.1)       | 36.8 (29.3-44.4)            | 37.7 (34.7-40.7)    |  |  |
| Midwest                            | 501                                                                  | 21.1 (17.3-25.0)    | 2601          | 22.1 (18.5-25.8)    | 36.6 (32.1-41.2)                                                          | 16.1 (13.5-18.6)    | 18.3 (13.2-23.4)                | 4.2 (3.1-5.3)       | 50.4 (45.5-55.3)            | 47.1 (43.2-51.0)    |  |  |
| South                              | 945                                                                  | 41.4 (36.3-46.4)    | 3894          | 37.1 (32.5-41.8)    | 37.3 (33.6-41.0)                                                          | 16.3 (14.6-18.0)    | 23.2 (19.7-26.6)                | 5.8 (4.8-6.8)       | 53.3 (48.6-58.0)            | 49.6 (46.4-52.7)    |  |  |
| West                               | 315                                                                  | 18.1 (13.2-23.1)    | 2005          | 21.5 (16.2-26.8)    | 33.6 (26.3-40.8)                                                          | 12.0 (10.5-13.4)    | 18.9 (13.4-24.4)                | 3.5 (2.4-4.6)       | 42.1 (33.5-50.8)            | 36.7 (33.3-40.1)    |  |  |
| <b>Specific chronic conditions</b> |                                                                      |                     |               |                     |                                                                           |                     |                                 |                     |                             |                     |  |  |
| Alzheimer's/dementia               | 13                                                                   | 0.8 (0.3-1.4)       | 266           | 1.9 (1.6-2.1)       | 42.4 (7.3-77.4)                                                           | 11.0 (6.7-15.2)     | 30.1 (0.0-63.3)                 | 6.7 (2.4-11.0)      | 43.4 (9.0-77.9)             | 40.9 (34.9-47.0)    |  |  |
| Arthritis                          | 870                                                                  | 49.5 (46.3-52.7)    | 5097          | 46.9 (45.5-48.3)    | 43.4 (39.7-47.1)                                                          | 17.9 (16.5-19.3)    | 25.9 (22.4-29.3)                | 6.2 (5.3-7.0)       | 54.1 (49.7-58.6)            | 48.5 (46.3-50.7)    |  |  |
| Cancer                             | 232                                                                  | 13.1 (11.2-15.0)    | 2126          | 18.6 (17.7-19.6)    | 39.8 (32.3-47.4)                                                          | 15.5 (13.7-17.2)    | 22.8 (15.4-30.1)                | 4.8 (3.6-5.9)       | 49.9 (41.6-58.2)            | 46.9 (43.6-50.1)    |  |  |
| Cardiac                            | 636                                                                  | 35.8 (32.9-38.6)    | 4544          | 39.4 (38.2-40.6)    | 35.9 (31.8-39.9)                                                          | 16.0 (14.6-17.4)    | 18.3 (15.0-21.7)                | 5.7 (4.8-6.6)       | 53.8 (48.7-58.8)            | 48.5 (46.4-50.7)    |  |  |
| Diabetes                           | 663                                                                  | 37.1 (34.8-39.4)    | 3361          | 32.2 (30.8-33.5)    | 37.1 (33.0-41.3)                                                          | 18.7 (17.0-20.4)    | 23.3 (18.4-28.2)                | 7.4 (6.1-8.8)       | 52.6 (47.1-58.2)            | 48.8 (46.5-51.0)    |  |  |
| Hypertension                       | 1077                                                                 | 58.5 (55.8-61.1)    | 7175          | 65.3 (64.0-66.6)    | 35.2 (32.0-38.4)                                                          | 16.0 (14.9-17.2)    | 21.3 (18.3-24.4)                | 5.7 (5.0-6.5)       | 49.9 (45.6-54.2)            | 46.2 (44.1-48.3)    |  |  |
| Neurological                       | 204                                                                  | 11.2 (9.2-13.2)     | 395           | 3.6 (3.2-3.9)       | 30.6 (23.4-37.9)                                                          | 18.7 (13.6-23.7)    | 19.3 (12.8-25.9)                | 8.3 (5.3-11.3)      | 59.7 (50.8-68.6)            | 48.1 (42.4-53.9)    |  |  |
| Psychiatric/depression             | 1381                                                                 | 61.9 (59.0-64.9)    | 2334          | 22.4 (21.3-23.4)    | 39.3 (35.8-42.8)                                                          | 21.4 (19.1-23.6)    | 21.8 (18.9-24.6)                | 8.5 (7.1-10.0)      | 51.0 (47.1-54.8)            | 51.8 (48.9-54.7)    |  |  |
| Pulmonary                          | 639                                                                  | 32.5 (29.6-35.4)    | 2001          | 18.5 (17.5-19.5)    | 41.9 (37.3-46.6)                                                          | 22.3 (19.8-24.8)    | 23.2 (18.7-27.8)                | 9.0 (7.4-10.6)      | 50.5 (45.5-55.5)            | 49.0 (46.4-51.5)    |  |  |
| Stroke                             | 228                                                                  | 13.2 (11.2-15.2)    | 1131          | 9.3 (8.7-9.9)       | 32.7 (24.7-40.7)                                                          | 18.0 (15.3-20.6)    | 20.8 (14.0-27.5)                | 6.3 (4.2-8.3)       | 55.5 (46.0-64.9)            | 46.1 (42.0-50.1)    |  |  |

**Supplemental Digital Content 2b:**  
**Sensitivity analyses examining US region and specific chronic conditions**  
**as potential risk factors for cost-related nonadherence**

| Characteristic                                                               | Any cost-related nonadherence |                         |
|------------------------------------------------------------------------------|-------------------------------|-------------------------|
|                                                                              | Under 65 y                    | 65 y and over           |
|                                                                              | OR (95% CI)                   | OR (95% CI)             |
| <b>Age, y</b>                                                                |                               |                         |
| ≤54                                                                          | 1.00                          |                         |
| 55-64                                                                        | <b>0.73 (0.56-0.94)</b>       |                         |
| 65-74                                                                        |                               | 1.00                    |
| 75-84                                                                        |                               | <b>0.60 (0.51-0.71)</b> |
| ≥85                                                                          |                               | <b>0.38 (0.30-0.48)</b> |
| <b>Sex</b>                                                                   |                               |                         |
| Male                                                                         | 1.00                          | 1.00                    |
| Female                                                                       | <b>1.44 (1.10-1.87)</b>       | 1.14 (0.97-1.33)        |
| <b>Household income, \$</b>                                                  |                               |                         |
| < \$15K                                                                      | 0.80 (0.44-1.43)              | 1.04 (0.80-1.37)        |
| \$15k to \$25k                                                               | 1.01 (0.59-1.73)              | <b>1.46 (1.22-1.75)</b> |
| \$25k to \$50k                                                               | 0.88 (0.48-1.62)              | <b>1.36 (1.17-1.59)</b> |
| > \$50K                                                                      | 1.00                          | 1.00                    |
| <b>Education</b>                                                             |                               |                         |
| No high school diploma                                                       | 1.43 (0.72-2.87)              | 0.98 (0.80-1.21)        |
| High school diploma                                                          | 1.01 (0.59-1.73)              | 0.84 (0.68-1.04)        |
| Some college                                                                 | 1.19 (0.66-2.15)              | 1.01 (0.83-1.22)        |
| Bachelors and above                                                          | 1.00                          | 1.00                    |
| <b>Race</b>                                                                  |                               |                         |
| White                                                                        | 1.00 (0.00-0.00)              | 1.00                    |
| African American                                                             | 1.30 (0.87-1.95)              | 1.27 (0.95-1.71)        |
| All Other                                                                    | 1.43 (0.91-2.25)              | 0.98 (0.72-1.34)        |
| <b>Hispanic ethnicity</b>                                                    |                               |                         |
| Not Hispanic                                                                 | 1.00                          | 1.00                    |
| Hispanic                                                                     | <b>0.52 (0.32-0.83)</b>       | 0.89 (0.65-1.21)        |
| <b>US region</b>                                                             |                               |                         |
| Northeast                                                                    | 1.00                          | 1.00                    |
| Midwest                                                                      | 1.24 (0.82-1.88)              | <b>1.45 (1.13-1.86)</b> |
| South                                                                        | 1.31 (0.91-1.88)              | <b>1.39 (1.11-1.76)</b> |
| West                                                                         | 1.14 (0.69-1.88)              | 1.17 (0.92-1.49)        |
| <b>General health status</b>                                                 |                               |                         |
| Excellent, very good, or good                                                | 1.00                          | 1.00                    |
| Fair or poor                                                                 | 1.30 (0.99-1.72)              | <b>1.43 (1.20-1.71)</b> |
| <b>No. of limitations in ADLs*</b>                                           |                               |                         |
| Zero                                                                         | 1.00                          | 1.00                    |
| 1 to 2                                                                       | 1.20 (0.85-1.68)              | <b>1.47 (1.24-1.74)</b> |
| 3 to 6                                                                       | 1.43 (0.99-2.07)              | <b>1.89 (1.53-2.33)</b> |
| <b>Specific chronic conditions</b><br>(reference is not reporting diagnosis) |                               |                         |
| Alzheimer's/dementia                                                         | 1.02 (0.24-4.37)              | 0.60 (0.39-0.92)        |
| Arthritis                                                                    | <b>1.72 (1.29-2.29)</b>       | <b>1.33 (1.14-1.56)</b> |
| Cancer                                                                       | 1.31 (0.91-1.89)              | 1.04 (0.88-1.22)        |
| Cardiac                                                                      | 1.00 (0.76-1.34)              | 1.00 (0.87-1.15)        |
| Diabetes                                                                     | 1.12 (0.88-1.44)              | <b>1.35 (1.16-1.58)</b> |
| Hypertension                                                                 | 0.93 (0.69-1.26)              | <b>1.17 (1.00-1.38)</b> |
| Neurological                                                                 | 0.76 (0.49-1.17)              | 0.92 (0.62-1.35)        |
| Psychiatric/depression                                                       | <b>1.60 (1.19-2.17)</b>       | <b>1.39 (1.16-1.66)</b> |
| Pulmonary                                                                    | <b>1.36 (1.05-1.78)</b>       | <b>1.59 (1.33-1.89)</b> |
| Stroke                                                                       | 0.86 (0.57-1.31)              | 1.01 (0.85-1.20)        |
| <b>Drug Coverage</b>                                                         |                               |                         |
| Part D with Low Income Subsidy                                               | 1.00                          | 1.00                    |
| Medicare Advantage with Part D                                               | <b>2.18 (1.38-3.44)</b>       | 1.17 (0.87-1.57)        |
| Traditional Medicare with Part D                                             | <b>2.76 (1.60-4.75)</b>       | <b>1.57 (1.18-2.10)</b> |
| Other drug supplement plan                                                   | 0.80 (0.44-1.44)              | 0.78 (0.54-1.11)        |
| No drug coverage                                                             | <b>1.75 (1.03-2.97)</b>       | 1.15 (0.77-1.73)        |

**Supplemental Digital Content 2c:**  
**Sensitivity analyses examining US region and specific chronic conditions**  
**as potential risk factors for spending less on other basic needs**

| Characteristic                                                               | Spent less on other basic needs |                         |
|------------------------------------------------------------------------------|---------------------------------|-------------------------|
|                                                                              | Under 65 y                      | 65 y and over           |
|                                                                              | OR (95% CI)                     | OR (95% CI)             |
| <b>Age, y</b>                                                                |                                 |                         |
| ≤54                                                                          | 1.00                            |                         |
| 55-64                                                                        | 0.88 (0.64-1.20)                |                         |
| 65-74                                                                        |                                 | 1.00                    |
| 75-84                                                                        |                                 | <b>0.65 (0.51-0.83)</b> |
| ≥85                                                                          |                                 | <b>0.29 (0.20-0.41)</b> |
| <b>Sex</b>                                                                   |                                 |                         |
| Male                                                                         | 1.00                            | 1.00                    |
| Female                                                                       | 1.32 (0.94-1.87)                | 1.23 (0.96-1.59)        |
| <b>Household income, \$</b>                                                  |                                 |                         |
| < \$15K                                                                      | 1.37 (0.76-2.48)                | <b>1.71 (1.03-2.84)</b> |
| \$15k to \$25k                                                               | 1.50 (0.80-2.81)                | <b>2.68 (1.83-3.94)</b> |
| \$25k to \$50k                                                               | 1.25 (0.72-2.18)                | <b>1.79 (1.18-2.71)</b> |
| > \$50K                                                                      | 1.00                            | 1.00                    |
| <b>Education</b>                                                             |                                 |                         |
| No high school diploma                                                       | 0.77 (0.38-1.54)                | 1.39 (0.88-2.20)        |
| High school diploma                                                          | 0.84 (0.45-1.57)                | 1.48 (0.97-2.26)        |
| Some college                                                                 | 0.90 (0.46-1.75)                | 1.23 (0.84-1.81)        |
| Bachelors and above                                                          | 1.00                            | 1.00                    |
| <b>Race</b>                                                                  |                                 |                         |
| White                                                                        | 1.00                            | 1.00                    |
| African American                                                             | <b>1.66 (1.04-2.66)</b>         | <b>1.64 (1.18-2.28)</b> |
| All Other                                                                    | <b>1.79 (1.04-3.06)</b>         | <b>1.66 (1.11-2.50)</b> |
| <b>Hispanic ethnicity</b>                                                    |                                 |                         |
| Not Hispanic                                                                 | 1.00                            | 1.00                    |
| Hispanic                                                                     | 0.78 (0.41-1.47)                | 0.75 (0.43-1.32)        |
| <b>US region</b>                                                             |                                 |                         |
| Northeast                                                                    | 1.00                            | 1.00                    |
| Midwest                                                                      | 1.44 (0.79-2.61)                | 0.88 (0.59-1.29)        |
| South                                                                        | <b>1.93 (1.08-3.45)</b>         | 1.13 (0.81-1.58)        |
| West                                                                         | 1.37 (0.70-2.68)                | 0.86 (0.55-1.33)        |
| <b>General health status</b>                                                 |                                 |                         |
| Excellent, very good, or good                                                | 1.00                            | 1.00                    |
| Fair or poor                                                                 | <b>1.51 (1.04-2.20)</b>         | <b>1.61 (1.22-2.14)</b> |
| <b>No. of limitations in ADLs*</b>                                           |                                 |                         |
| Zero                                                                         | 1.00                            | 1.00                    |
| 1 to 2                                                                       | 1.32 (0.94-1.84)                | <b>2.24 (1.61-3.12)</b> |
| 3 to 6                                                                       | <b>2.21 (1.45-3.37)</b>         | <b>2.78 (1.80-4.30)</b> |
| <b>Specific chronic conditions</b><br>(reference is not reporting diagnosis) |                                 |                         |
| Alzheimer's/dementia                                                         | 1.67 (0.38-7.41)                | 1.11 (0.56-2.19)        |
| Arthritis                                                                    | <b>1.66 (1.20-2.28)</b>         | 1.13 (0.88-1.45)        |
| Cancer                                                                       | 1.37 (0.82-2.29)                | 0.97 (0.73-1.29)        |
| Cardiac                                                                      | 0.66 (0.47-0.92)                | 0.97 (0.78-1.20)        |
| Diabetes                                                                     | 1.33 (0.88-1.99)                | <b>1.52 (1.12-2.06)</b> |
| Hypertension                                                                 | 1.23 (0.84-1.78)                | <b>1.39 (1.00-1.93)</b> |
| Neurological                                                                 | 0.84 (0.50-1.41)                | 1.16 (0.73-1.84)        |
| Psychiatric/depression                                                       | <b>1.44 (1.03-2.01)</b>         | <b>1.43 (1.10-1.85)</b> |
| Pulmonary                                                                    | 1.25 (0.89-1.74)                | <b>1.67 (1.34-2.10)</b> |
| Stroke                                                                       | 1.00 (0.63-1.60)                | 0.71 (0.50-1.01)        |
| <b>Drug Coverage</b>                                                         |                                 |                         |
| Part D with Low Income Subsidy                                               | 1.00                            | 1.00                    |
| Medicare Advantage with Part D                                               | <b>1.81 (1.05-3.12)</b>         | 0.88 (0.59-1.29)        |
| Traditional Medicare with Part D                                             | <b>2.62 (1.48-4.63)</b>         | 0.78 (0.50-1.20)        |
| Other drug supplement plan                                                   | 0.94 (0.48-1.84)                | <b>0.53 (0.30-0.94)</b> |
| No drug coverage                                                             | 1.96 (0.99-3.87)                | 0.63 (0.35-1.14)        |

**Supplemental Digital Content 2d:**  
**Sensitivity analyses examining US region and specific chronic conditions**  
**as potential risk factors for using cost reduction strategies**

| Characteristic                                                               | Any cost reduction strategy |                         |
|------------------------------------------------------------------------------|-----------------------------|-------------------------|
|                                                                              | Under 65 y                  | 65 y and over           |
|                                                                              | OR (95% CI)                 | OR (95% CI)             |
| <b>Age, y</b>                                                                |                             |                         |
| ≤54                                                                          | 1.00                        |                         |
| 55-64                                                                        | 1.09 (0.83-1.44)            |                         |
| 65-74                                                                        |                             | 1.00                    |
| 75-84                                                                        |                             | <b>0.78 (0.69-0.87)</b> |
| ≥85                                                                          |                             | <b>0.53 (0.46-0.60)</b> |
| <b>Sex</b>                                                                   |                             |                         |
| Male                                                                         | 1.00                        | 1.00                    |
| Female                                                                       | <b>1.34 (1.04-1.72)</b>     | 1.02 (0.93-1.12)        |
| <b>Household income, \$</b>                                                  |                             |                         |
| < \$15K                                                                      | 0.69 (0.41-1.15)            | 0.90 (0.74-1.08)        |
| \$15k to \$25k                                                               | 0.95 (0.56-1.62)            | 0.98 (0.84-1.13)        |
| \$25k to \$50k                                                               | 0.68 (0.39-1.16)            | 1.04 (0.91-1.18)        |
| > \$50K                                                                      | 1.00                        | 1.00                    |
| <b>Education</b>                                                             |                             |                         |
| No high school diploma                                                       | 0.70 (0.41-1.21)            | <b>0.78 (0.65-0.92)</b> |
| High school diploma                                                          | 0.73 (0.44-1.21)            | 0.89 (0.76-1.04)        |
| Some college                                                                 | 0.83 (0.51-1.33)            | 0.93 (0.79-1.09)        |
| Bachelors and above                                                          | 1.00                        | 1.00                    |
| <b>Race</b>                                                                  |                             |                         |
| White                                                                        | 1.00                        | 1.00                    |
| African American                                                             | <b>0.63 (0.44-0.90)</b>     | <b>0.62 (0.49-0.77)</b> |
| All Other                                                                    | 0.96 (0.62-1.49)            | <b>0.75 (0.59-0.97)</b> |
| <b>Hispanic ethnicity</b>                                                    |                             |                         |
| Not Hispanic                                                                 | 1.00                        | 1.00                    |
| Hispanic                                                                     | <b>0.49 (0.32-0.76)</b>     | <b>0.67 (0.50-0.89)</b> |
| <b>US region</b>                                                             |                             |                         |
| Northeast                                                                    | 1.00                        | 1.00                    |
| Midwest                                                                      | <b>1.52 (1.00-2.31)</b>     | <b>1.41 (1.15-1.73)</b> |
| South                                                                        | <b>1.85 (1.25-2.73)</b>     | <b>1.73 (1.44-2.07)</b> |
| West                                                                         | 1.13 (0.71-1.81)            | 1.02 (0.84-1.23)        |
| <b>General health status</b>                                                 |                             |                         |
| Excellent, very good, or good                                                | 1.00                        | 1.00                    |
| Fair or poor                                                                 | 1.07 (0.84-1.35)            | 0.99 (0.88-1.13)        |
| <b>No. of limitations in ADLs*</b>                                           |                             |                         |
| Zero                                                                         | 1.00                        | 1.00                    |
| 1 to 2                                                                       | 1.05 (0.82-1.34)            | <b>1.16 (1.01-1.32)</b> |
| 3 to 6                                                                       | 1.21 (0.87-1.67)            | <b>1.43 (1.19-1.71)</b> |
| <b>Specific chronic conditions</b><br>(reference is not reporting diagnosis) |                             |                         |
| Alzheimer's/dementia                                                         | 0.49 (0.15-1.62)            | 0.93 (0.69-1.26)        |
| Arthritis                                                                    | 1.23 (0.95-1.59)            | <b>1.28 (1.16-1.42)</b> |
| Cancer                                                                       | 1.03 (0.67-1.58)            | 1.08 (0.94-1.24)        |
| Cardiac                                                                      | 1.31 (0.97-1.78)            | <b>1.24 (1.12-1.36)</b> |
| Diabetes                                                                     | 1.23 (0.94-1.61)            | <b>1.29 (1.16-1.43)</b> |
| Hypertension                                                                 | 1.07 (0.79-1.47)            | <b>1.18 (1.05-1.32)</b> |
| Neurological                                                                 | 1.45 (0.95-2.21)            | 0.99 (0.77-1.28)        |
| Psychiatric/depression                                                       | 1.30 (0.99-1.70)            | <b>1.37 (1.20-1.56)</b> |
| Pulmonary                                                                    | 0.91 (0.71-1.17)            | <b>1.15 (1.03-1.28)</b> |
| Stroke                                                                       | 1.08 (0.71-1.64)            | 0.98 (0.83-1.15)        |
| <b>Drug Coverage</b>                                                         |                             |                         |
| Part D with Low Income Subsidy                                               | 1.00                        | 1.00                    |
| Medicare Advantage with Part D                                               | <b>2.89 (1.74-4.79)</b>     | <b>1.57 (1.26-1.96)</b> |
| Traditional Medicare with Part D                                             | <b>3.52 (1.94-6.37)</b>     | <b>2.10 (1.73-2.56)</b> |
| Other drug supplement plan                                                   | 0.93 (0.52-1.67)            | <b>1.35 (1.06-1.71)</b> |
| No drug coverage                                                             | 1.07 (0.59-1.94)            | 1.21 (0.93-1.58)        |
